# Supplementary material for: Comparative Whole Genome Analysis of an Anaplasma phagocytophilum Strain Isolated from Norwegian Sheep
Source: Pathogens. 2022 May 21;11(5):601. doi: 10.3390/pathogens11050601 (PMC9146208; doi:10.3390/pathogens11050601)
Supplement: Supplementary file 1 [file pathogens-11-00601-s001.zip › Supplementary Table S1.xlsx]

## Sheet: ApAllvApAll_jspecies
Supplementary Table 1. Average Nucleotide Identity (ANIb)a
	ApHZ2_NY	ApNYW_NY	ApNCH1_MA	ApWI1_WI	ApWebster_WI	ApHGE1_MN	ApHGE2_MN	ApRodent1_MN	ApRodent2_MN	ApDog2_MN	ApHorse1_MN	ApHorse1_CA	ApCRT35_MN	ApCRT38_MN	ApCRT53_MN	ApDog1_GER	ApDog2_GER	ApHorse1_FRA	ApHorse2_FRA	ApRoeDeer1_GER	ApBov1_FRA	ApCow1_FRA	ApCow2_FRA	ApCow3_FRA	ApCow4_FRA	ApCow5_GER	ApSheep_NorV1	ApSheep_NorV2
ApHZ2_NY	---	99.93	99.76	99.63	99.67	99.67	99.62	99.66	99.56	99.68	99.54	98.35	96.93	96.93	96.96	96.25	96.2	95.52	96.15	95.87	96.41	95.3	95.19	95.7	95.57	96.01	95.04	96.07
ApNYW_NY	99.95	---	99.79	99.68	99.65	99.67	99.68	99.65	99.57	99.67	99.58	98.46	97.07	96.92	96.98	96.37	96.39	95.78	96.31	96	96.6	95.39	95.26	95.54	95.61	95.97	95.13	96.18
ApNCH1_MA	99.96	99.94	---	99.75	99.77	99.76	99.75	99.78	99.65	99.76	99.71	98.76	97.27	97.24	97.26	96.7	96.69	96.27	96.52	96.28	96.79	95.86	95.67	96.06	96.09	96.37	95.39	96.65
ApWI1_WI	99.62	99.57	99.51	---	99.79	99.95	99.97	99.79	99.78	99.97	99.84	98.47	96.93	96.88	96.96	96.27	96.17	95.54	96.1	95.92	96.45	95.21	95.16	95.62	95.57	95.97	95.11	96.17
ApWebster_WI	99.63	99.61	99.46	99.76	---	99.74	99.77	99.93	99.62	99.77	99.66	98.36	96.88	96.88	96.95	96.33	96.19	95.68	96.14	95.91	96.47	95.51	95.15	95.69	95.67	95.9	95.05	96.2
ApHGE1_MN	99.62	99.59	99.47	99.97	99.77	---	99.96	99.79	99.79	99.98	99.86	98.39	97.03	96.9	97	96.35	96.29	95.49	96.21	95.94	96.43	95.31	95.11	95.55	95.52	95.93	95.04	96.22
ApHGE2_MN	99.63	99.59	99.47	99.96	99.71	99.95	---	99.71	99.76	99.96	99.83	98.38	96.98	96.89	96.86	96.23	96.16	95.51	96.17	95.88	96.43	95.19	95.04	95.55	95.51	95.84	94.99	96.18
ApRodent1_MN	99.65	99.6	99.49	99.79	99.95	99.79	99.78	---	99.6	99.8	99.62	98.39	96.93	96.87	96.95	96.31	96.23	95.46	96.18	95.95	96.42	95.3	95.14	95.63	95.54	95.96	95.01	96.12
ApRodent2_MN	99.67	99.62	99.63	99.9	99.73	99.89	99.9	99.73	---	99.9	99.88	98.59	97.17	97.11	97.16	96.48	96.49	95.87	96.37	96.03	96.61	95.62	95.38	95.77	95.76	96.14	95.26	96.39
ApDog2_MN	99.63	99.6	99.45	99.97	99.76	99.98	99.97	99.77	99.79	---	99.82	98.33	96.87	96.84	96.85	96.24	96.28	95.52	96.01	95.69	96.32	95.29	95	95.51	95.38	95.73	95	96.13
ApHorse1_MN	99.66	99.63	99.57	99.96	99.72	99.96	99.95	99.73	99.87	99.96	---	98.52	97.13	97.11	97.1	96.52	96.46	95.85	96.36	96.11	96.67	95.59	95.41	95.85	95.77	96.16	95.32	96.39
ApHorse1_CA	98.47	98.44	98.46	98.52	98.43	98.53	98.52	98.45	98.45	98.52	98.47	---	96.66	96.74	96.7	96.39	96.4	95.61	96.28	95.92	96.67	95.35	95.23	95.61	95.63	96.09	95.08	96.31
ApCRT35_MN	97	96.98	96.96	96.98	97	96.97	96.97	97.01	97.01	96.97	96.99	96.72	---	99.55	99.57	95.7	95.67	95.64	95.74	95.63	95.87	95.24	94.89	95.31	95.29	95.55	94.9	95.65
ApCRT38_MN	96.78	96.78	96.82	96.79	96.82	96.81	96.79	96.82	96.81	96.79	96.85	96.51	99.46	---	99.49	95.41	95.38	95.38	95.28	95.5	95.57	94.93	94.67	95.05	95.05	95.29	94.62	95.38
ApCRT53_MN	96.84	96.85	96.8	96.8	96.76	96.8	96.78	96.78	96.8	96.78	96.77	96.47	99.47	99.43	---	95.4	95.34	95.29	95.37	95.39	95.66	94.75	94.41	94.91	94.98	95.17	94.55	95.32
ApDog1_GER	96.21	96.22	96.2	96.21	96.22	96.23	96.16	96.21	96.22	96.22	96.25	96.17	95.47	95.35	95.41	---	97.98	96.17	98.76	96.02	97.29	95.86	95.65	95.94	96.03	96.34	95.52	97.01
ApDog2_GER	96.27	96.34	96.49	96.22	96.27	96.3	96.24	96.26	96.31	96.26	96.28	96.24	95.6	95.48	95.49	97.96	---	95.9	97.68	95.94	97.22	95.9	95.61	95.99	95.94	96.38	95.56	96.86
ApHorse1_FRA	96.04	96.07	96.14	96.03	96.01	96.03	96.01	96.02	96.06	96.03	96.03	96.09	95.94	95.84	95.85	96.7	96.54	---	97.44	98.03	96.97	96.16	95.95	96.13	96.19	96.33	95.84	96.48
ApHorse2_FRA	95.67	95.67	95.66	95.68	95.64	95.68	95.67	95.63	95.61	95.68	95.67	95.76	95.11	95.1	95	97.95	97.13	96.6	---	96.23	96.58	95.65	95.42	95.9	95.81	95.99	95.27	96.26
ApRoeDeer1_GER	96.06	96.1	96.15	96.06	96.06	96.06	96.04	96.06	96.09	96.06	96.07	96.02	95.77	95.77	95.81	96.3	96.32	97.73	97.03	---	96.81	95.94	95.89	96.17	96.25	96.34	95.47	96.42
ApBov1_FRA	96.78	96.79	96.77	96.74	96.75	96.76	96.74	96.77	96.78	96.74	96.76	96.86	96.06	96.04	96.07	97.58	97.43	97.01	97.53	96.99	---	97.19	97.06	97.45	97.46	97.85	96.36	97.87
ApCow1_FRA	95.33	95.4	95.47	95.37	95.38	95.38	95.38	95.38	95.36	95.37	95.35	95.29	94.98	95.01	95.01	95.92	95.98	95.68	96.14	95.73	96.79	---	97.98	97.97	98.03	98.01	96.79	96.23
ApCow2_FRA	95.01	95.05	95.12	94.97	95.02	94.97	94.96	95.01	95.01	94.97	95.04	95.03	94.77	94.61	94.68	95.77	95.66	95.71	95.82	95.77	96.74	97.88	---	99.72	99.77	99.61	96.96	95.95
ApCow3_FRA	95.54	95.55	95.62	95.52	95.55	95.53	95.52	95.55	95.54	95.53	95.58	95.53	95.23	95.23	95.23	96.21	96.08	95.89	96.22	95.96	97.2	98.06	99.81	---	99.77	99.65	96.99	96.48
ApCow4_FRA	95.78	95.79	95.82	95.74	95.78	95.75	95.75	95.79	95.74	95.75	95.76	95.74	95.35	95.32	95.37	96.28	96.25	95.83	96.3	96.1	97.17	98.12	99.86	99.73	---	99.52	97	96.54
ApCow5_GER	96.25	96.22	96.28	96.24	96.26	96.24	96.23	96.26	96.23	96.24	96.21	96.17	95.7	95.67	95.64	96.83	96.74	96.35	96.83	96.51	97.64	98.27	99.83	99.79	99.79	---	97.42	97.08
ApSheep_NorV1	94.83	94.91	94.89	94.78	94.76	94.78	94.77	94.77	94.82	94.78	94.86	94.9	94.61	94.59	94.54	95.56	95.41	95.08	95.42	95.14	95.74	96.59	96.76	96.67	96.67	96.73	---	95.69
ApSheep_NorV2	95.93	96.08	96.2	96.02	96.01	96.1	96.01	96.02	96.06	96.08	96.08	96.18	95.47	95.29	95.35	96.9	96.7	96.09	96.68	96	97.47	96.16	95.88	96.3	96.4	96.68	95.7	---
aANI calculation based on pairwise comparisons using BLAST algoritm (Ritcher et al. PMID: 26576653)
