# Supplementary material for: Comparative Whole Genome Analysis of an Anaplasma phagocytophilum Strain Isolated from Norwegian Sheep
Source: Pathogens. 2022 May 21;11(5):601. doi: 10.3390/pathogens11050601 (PMC9146208; doi:10.3390/pathogens11050601)
Supplement: Supplementary file 1 [file pathogens-11-00601-s001.zip › Supplementary Table S2.xlsx]

## Sheet: Sheet1
	ApHZ2_NY	ApNYW_NY	ApNCH1_MA	ApWI1_WI	ApWebster_WI	ApHGE1_MN	ApHGE2_MN	ApRodent1_MN	ApRodent2_MN	ApDog2_MN	ApHorse1_MN	ApHorse1_CA	ApCRT35_MN	ApCRT38_MN	ApCRT53_MN	ApDog1_GER	ApDog2_GER	ApHorse1_FRA	ApHorse2_FRA	ApRoeDeer_GER	ApBov1_FRA	ApCow1_FRA	ApCow2_FRA	ApCow3_FRA	ApCow4_FRA	ApCow5_GER	ApSheep_NorV1	ApSheep_NorV2
ApHZ2_NY	***	0.963855	0.518072	0.542169	0.542169	0.542169	0.542169	0.542169	0.421687	0.542169	0.433735	0	0.060241	0.0361446	0.13253	0	0	0	0	0	0	0	0	0	0	0	0	0
ApNYW_NY	0.880435	***	0.467391	0.478261	0.478261	0.478261	0.478261	0.467391	0.380435	0.478261	0.391304	0	0.0543478	0.0326087	0.119565	0	0	0	0	0	0	0	0	0	0	0	0	0
ApNCH1_MA	0.711864	0.711864	***	0.440678	0.457627	0.440678	0.440678	0.440678	0.389831	0.423729	0.389831	0	0.0169492	0.0338983	0.0847458	0	0	0	0	0	0	0	0	0	0	0	0	0
ApWI1_WI	0.517647	0.482353	0.317647	***	0.623529	0.988235	0.976471	0.658824	0.682353	0.988235	0.8	0.0117647	0.0823529	0.0470588	0.117647	0	0	0	0	0	0	0	0	0	0	0	0	0
ApWebster_WI	0.542169	0.518072	0.325301	0.638554	***	0.638554	0.626506	0.939759	0.506024	0.626506	0.518072	0.0120482	0.060241	0.060241	0.120482	0	0	0	0	0	0	0	0	0	0	0	0	0
ApHGE1_MN	0.517647	0.482353	0.317647	0.988235	0.623529	***	0.976471	0.647059	0.682353	1	0.788235	0.0117647	0.0705882	0.0470588	0.117647	0	0	0	0	0	0	0	0	0	0	0	0	0
ApHGE2_MN	0.517647	0.482353	0.317647	0.976471	0.623529	0.976471	***	0.658824	0.694118	0.976471	0.8	0.0117647	0.0823529	0.0470588	0.117647	0	0	0	0	0	0	0	0	0	0	0	0	0
ApRodent1_MN	0.542169	0.506024	0.313253	0.674699	0.939759	0.674699	0.674699	***	0.481928	0.674699	0.542169	0.0120482	0.0361446	0.0481928	0.120482	0	0	0	0	0	0	0	0	0	0	0	0	0
ApRodent2_MN	0.447368	0.421053	0.302632	0.763158	0.552632	0.763158	0.776316	0.539474	***	0.75	0.671053	0.0131579	0.105263	0.0394737	0.118421	0	0	0	0	0	0	0	0	0	0	0	0	0
ApDog2_MN	0.517647	0.482353	0.317647	0.988235	0.623529	1	0.976471	0.658824	0.682353	***	0.8	0.0117647	0.0823529	0.0470588	0.129412	0	0	0	0	0	0	0	0	0	0	0	0	0
ApHorse1_MN	0.443038	0.417722	0.303797	0.848101	0.544304	0.848101	0.848101	0.56962	0.64557	0.848101	***	0.0126582	0.0886076	0.0506329	0.113924	0	0	0	0	0	0	0	0	0	0	0	0	0
ApHorse1_CA	0	0	0	0.0114943	0.0114943	0.0114943	0.0114943	0.0114943	0.0114943	0.0114943	0.0114943	***	0	0	0	0	0	0	0	0	0	0	0	0	0	0	0	0
ApCRT35_MN	0.0645161	0.0645161	0.016129	0.112903	0.0806452	0.0967742	0.112903	0.0483871	0.129032	0.112903	0.112903	0	***	0.306452	0.274194	0	0	0	0	0	0	0	0	0	0	0	0	0
ApCRT38_MN	0.0357143	0.0357143	0.0238095	0.047619	0.047619	0.0595238	0.047619	0.0357143	0.0357143	0	0.047619	0	0.22619	***	0.25	0	0	0	0	0	0	0	0	0	0	0	0	0
ApCRT53_MN	0.135802	0.135802	0.0740741	0.135802	0.135802	0.123457	0.135802	0.135802	0.111111	0.135802	0.111111	0	0.222222	0.296296	***	0	0	0	0	0	0	0	0	0	0	0	0	0
ApDog1_GER	0	0	0	0	0	0	0	0	0	0	0	0	0	0	0	***	0.210526	0.0394737	0.342105	0	0	0	0	0	0	0	0	0
ApDog2_GER	0	0	0	0	0	0	0	0	0	0	0	0	0	0	0	0.135802	***	0.0246914	0.17284	0	0	0.0123457	0.0123457	0.0123457	0.0123457	0.0123457	0	0
ApHorse1_FRA	0	0	0	0	0	0	0	0	0	0	0	0	0	0	0	0.1	0.0666667	***	0.333333	0.233333	0.0333333	0	0	0	0	0	0	0.0333333
ApHorse2_FRA	0	0	0	0	0	0	0	0	0	0	0	0	0	0	0	0.3125	0.21875	0.15625	***	0.046875	0	0.015625	0.015625	0.015625	0.015625	0.015625	0	0
ApRoeDeer_GER	0	0	0	0	0	0	0	0	0	0	0	0	0	0	0	0	0	0.170732	0.0731707	***	0.0243902	0	0	0	0	0	0	0.0487805
ApBov1_FRA	0	0	0	0	0	0	0	0	0	0	0	0	0	0	0	0	0	0.0232558	0	0.0232558	***	0.0465116	0.0465116	0.0465116	0.0465116	0.0465116	0.0232558	0.0697674
ApCow1_FRA	0	0	0	0	0	0	0	0	0	0	0	0	0	0	0	0	0.0140845	0	0.0140845	0	0.028169	***	0.225352	0.225352	0.267606	0.112676	0	0.0422535
ApCow2_FRA	0	0	0	0	0	0	0	0	0	0	0	0	0	0	0	0	0.0153846	0	0.0153846	0	0.0307692	0.230769	***	0.815385	0.861538	0.430769	0	0.0153846
ApCow3_FRA	0	0	0	0	0	0	0	0	0	0	0	0	0	0	0	0	0.015873	0	0.015873	0	0.031746	0.253968	0.84127	***	0.825397	0.444444	0	0.031746
ApCow4_FRA	0	0	0	0	0	0	0	0	0	0	0	0	0	0	0	0	0.0149254	0	0.0149254	0	0.0298507	0.283582	0.835821	0.776119	***	0.41791	0	0.0298507
ApCow5_GER	0	0	0	0	0	0	0	0	0	0	0	0	0	0	0	0	0.0263158	0	0.0263158	0	0.0526316	0.184211	0.736842	0.736842	0.736842	***	0	0.0263158
ApSheep_NorV1	0	0	0	0	0	0	0	0	0	0	0	0	0	0	0	0	0	0	0	0	0.0108696	0	0	0	0	0	***	0.0326087
ApSheep_NorV2	0	0	0	0	0	0	0	0	0	0	0	0	0	0	0	0	0	0.0125	0	0.025	0.0375	0.0375	0	0.025	0.025	0.0125	0.05	***
